# Supplementary material for: Microwave-annealing-induced nanowetting: a rapid and facile method for fabrication of one-dimensional polymer nanomaterials
Source: Royal Society of Chemistry journal article supplement (doi:10.1039/c5ra03037d), 2015-01-01
Supplement: c5ra03037d1.pdf [file c5ra03037d1.pdf]

## Supporting Information

# Microwave-Annealing-Induced Nanowetting: A Rapid and Facile Method for Fabrication of One-Dimensional Polymer Nanomaterials

*Chun-Wei Chang, Mu-Huan Chi, Chien-Wei Chu, Hao-Wen Ko, Yi-Hsuan Tu, Chia-Chan Tsai, and  
Jiun-Tai Chen\**

Department of Applied Chemistry, National Chiao Tung University, Hsinchu, Taiwan 30010

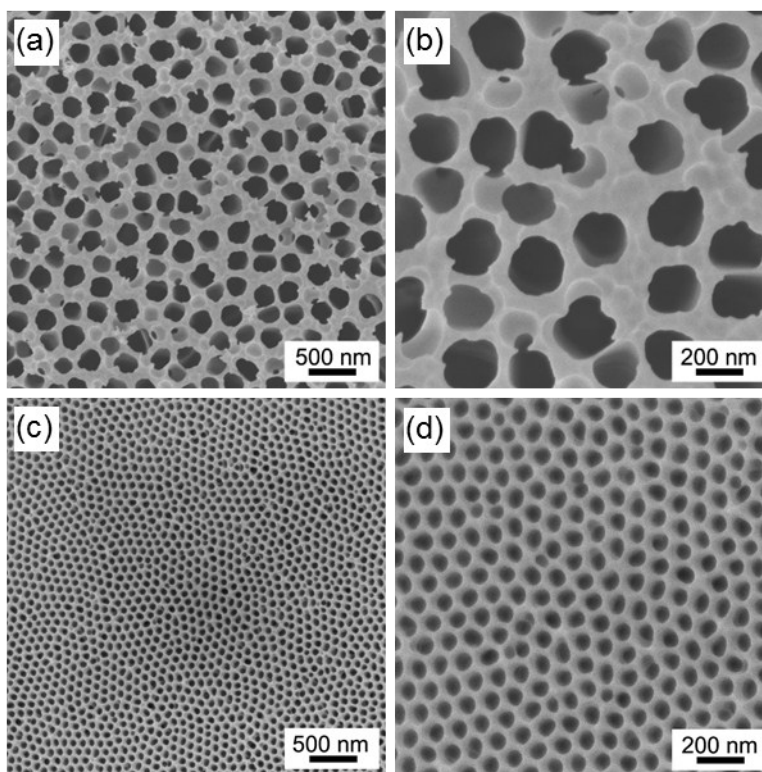

**Figure S1.** (a and b) SEM images of commercial AAO templates with lower and higher magnifications. The average pore diameter of the commercial templates is  $\sim 237$  nm. (c and d) SEM images of

synthesized AAO templates with lower and higher magnifications. The average pore diameter of the synthesized templates is ~60 nm.

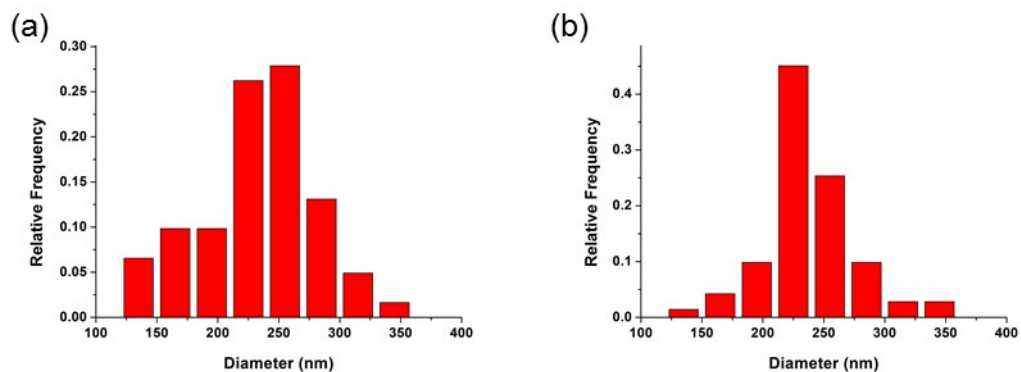

**Figure S2.** Size distribution diagrams of the PS ( $M_w$ : 35 kg/mol) nanomaterials fabricated by the thermal annealing method using commercial AAO templates at different annealing conditions. (a) PS nanorods by annealing at 120 °C for 30 min. The average diameter of the PS nanorods is ~233 nm. (b) PS nanotubes by annealing at 190 °C for 30 min. The average diameter of the PS nanotubes is ~247 nm.

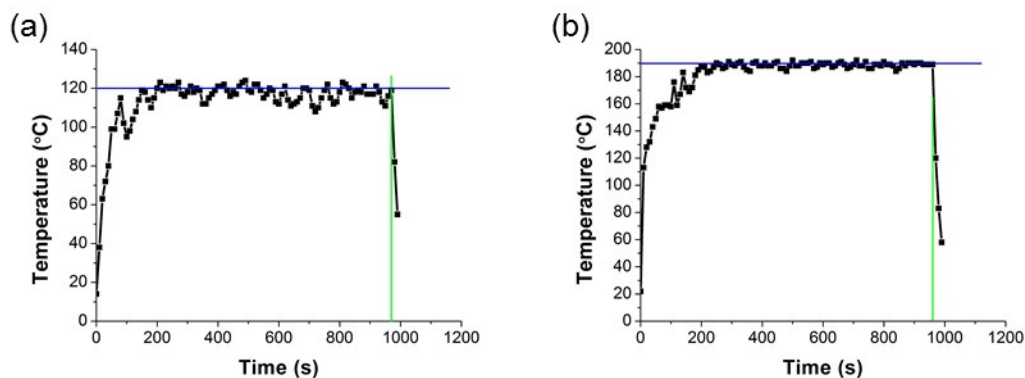

**Figure S3.** Heating profiles under different microwave annealing processes using 1×1 cm<sup>2</sup> silicon wafers: (a) 120 °C at 10 W for 15 min and (b) 190 °C at 30 W for 15 min. The blue and green lines indicate the set temperatures and times, respectively.

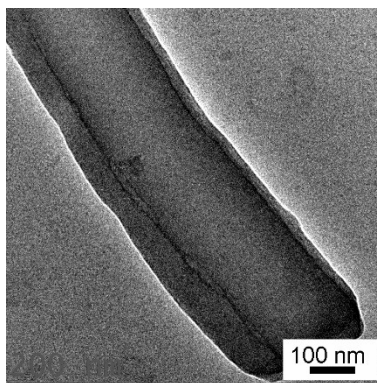

**Figure S4.** TEM image of a PS ( $M_w$ : 35 kg/mol) nanotube fabricated by the MAIN method using a commercial AAO template at 190 °C at 30 W for 15 min.

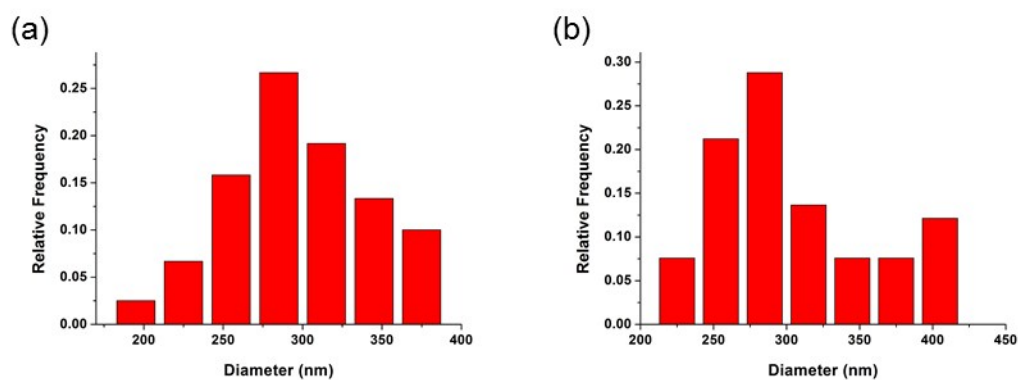

**Figure S5.** Size distribution diagrams of the PS ( $M_w$ : 35 kg/mol) nanomaterials fabricated by the MAIN method using commercial AAO templates at different annealing conditions. (a) PS nanorods by annealing at 120 °C at 10 W for 15 min. The average diameter of the PS nanorods is ~298 nm. (b) PS nanotubes by annealing at 190 °C at 30 W for 15 min. The average diameter of the PS nanorods is ~308 nm.

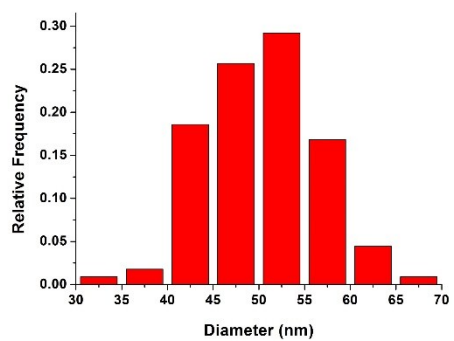

**Figure S6.** Size distribution diagram of the PS ( $M_w$ : 35 kg/mol) nanorods fabricated by the MAIN method using synthesized AAO templates at 120 °C at 5 W for 3 min. The average diameter of the PS nanorods is ~50 nm.
